# Supplementary material
Source: publisher figshare collection journal article supplement (https://acs.figshare.com/ndownloader/files/21554751)
Supplement: Supplementary file 1 [file 21554751]

## **Supporting Information**

# Comparative Study on Formation and Oxidation-Level Control of Three-Dimensional Conductive Nanofilm for Gas-Sensor Applications

*Kyung Hee Cho<sup>1</sup>, Jyongsik Jang<sup>1\*</sup>, and Jun Seop Lee<sup>2\*</sup>*

<sup>1</sup>School of Chemical and Biological Engineering, Seoul National University, 1 Gwanak-ro, Gwanak-gu, Seoul 151-742, Republic of Korea

<sup>2</sup>Department of Materials Science and Engineering, Gachon University, 1342 Seongnam-Daero, Sujeong-Gu, Seongnam-Si, Gyeonggi-Do 13120, Republic of Korea

Corresponding Author:

\*E-mail: (J. Jang) jsjang@plaza.snu.ac.kr; Tel.: +82-2-880-7069; Fax: +82-2-880-1604

\*E-mail: (J.S. Lee) junseop@gachon.ac.kr; Tel.: +82-31-750-5814; Fax: +82-31-750-5389

### 1. Various images of the 3D-CNF at 25°C polymerization

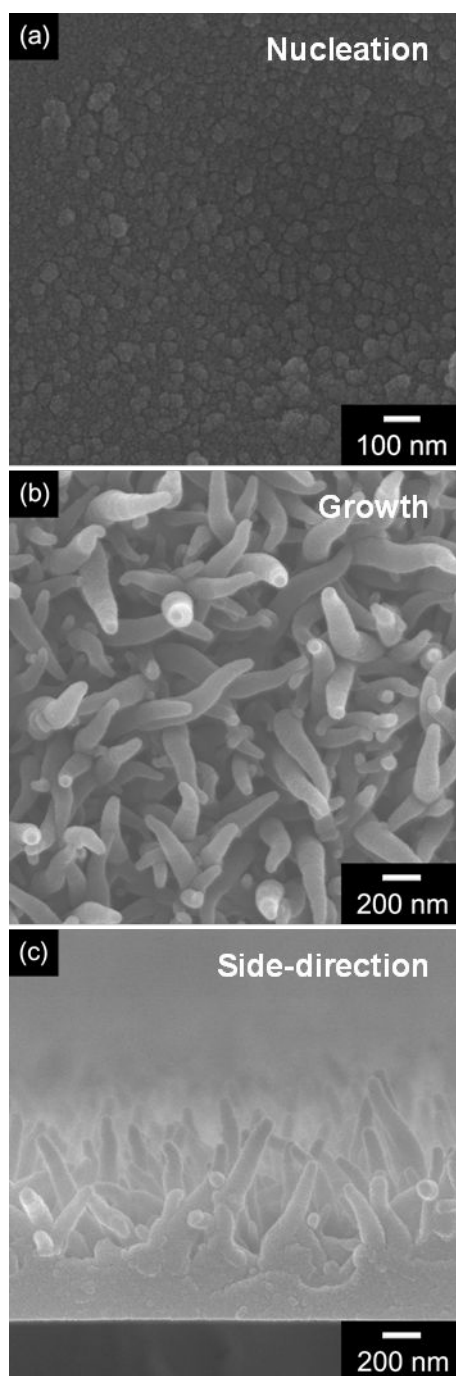

**Figure S1.** FE-SEM images of conductive nanofilm at 25°C during (a) nucleation, (b) growth and (c) side-direction.

## 2. Size change of the 3D-CNF with temperature variation

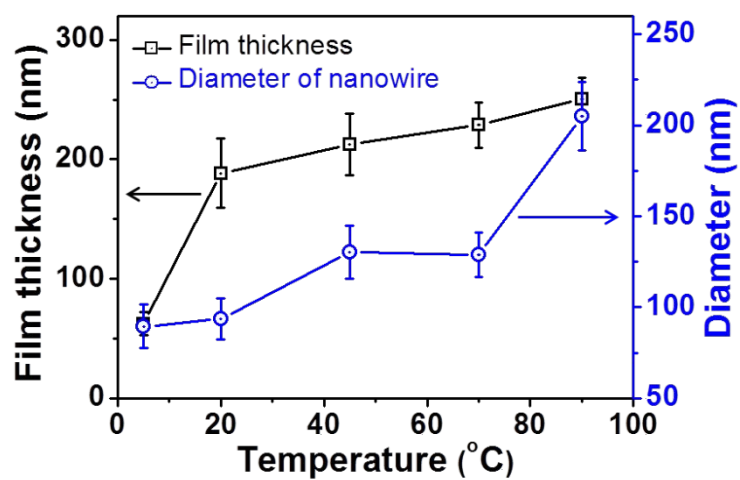

**Figure S2.** Thickness of films (black) and diameter of nanostructures in the 3D-CNF (blue) as a function of polymerization temperature.

### 3. Surface area of the conductive nanofilms with different temperatures

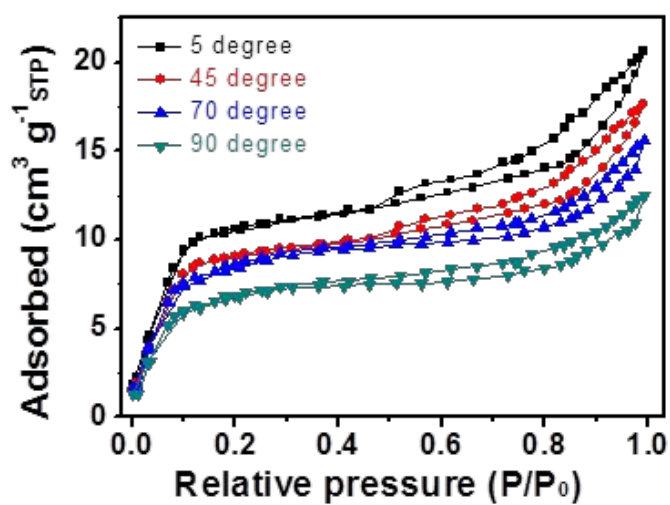

**Figure S3.** Nitrogen adsorption-desorption of different conductive nanofilms: 5°C (black); 45°C (red); 70°C (blue); 90°C (green).

#### 4. Different polypyrrole chain structure with changing of oxidation level

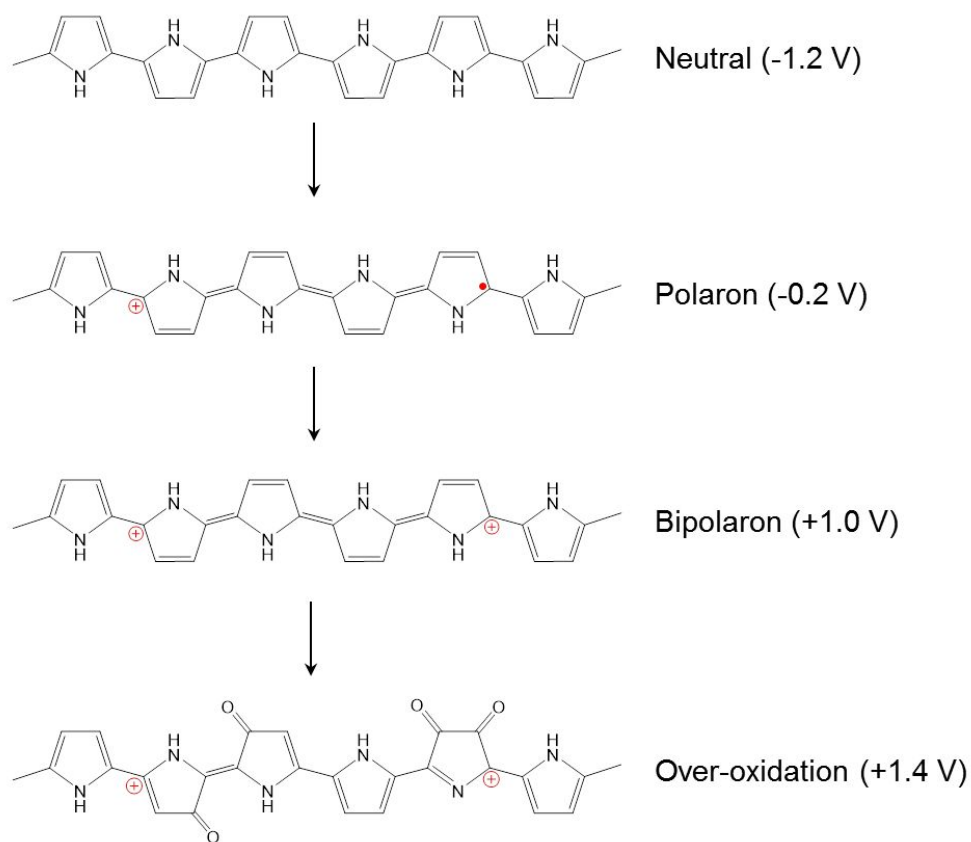

**Figure S4.** Chemical structures of polypyrrole chain at different chemical states.

## 5. Large scale FE-SEM images as a function of oxidation level

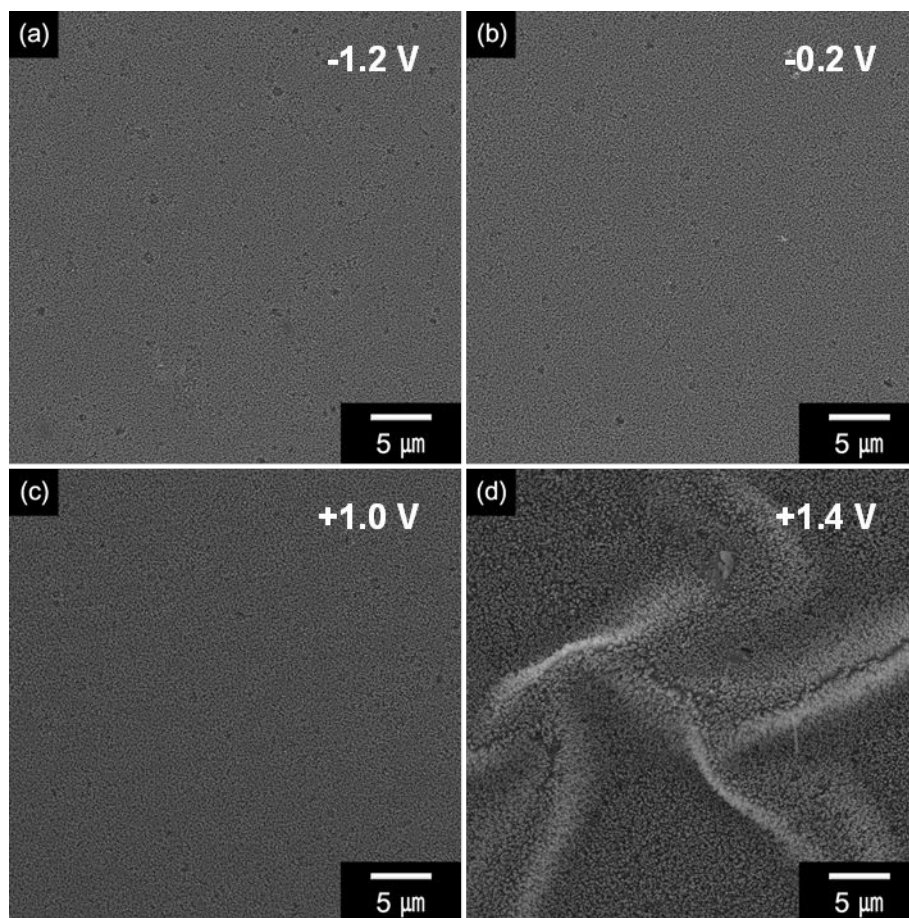

**Figure S5.** Low-magnification FE-SEM images of the 3D-CNF as a function of applied voltage variation: (a) -1.2 V; (b) -0.2 V; (c) +1.0 V; (d) +1.4 V.

## 6. Size deformation of the 3D-CNF as a function of oxidation level

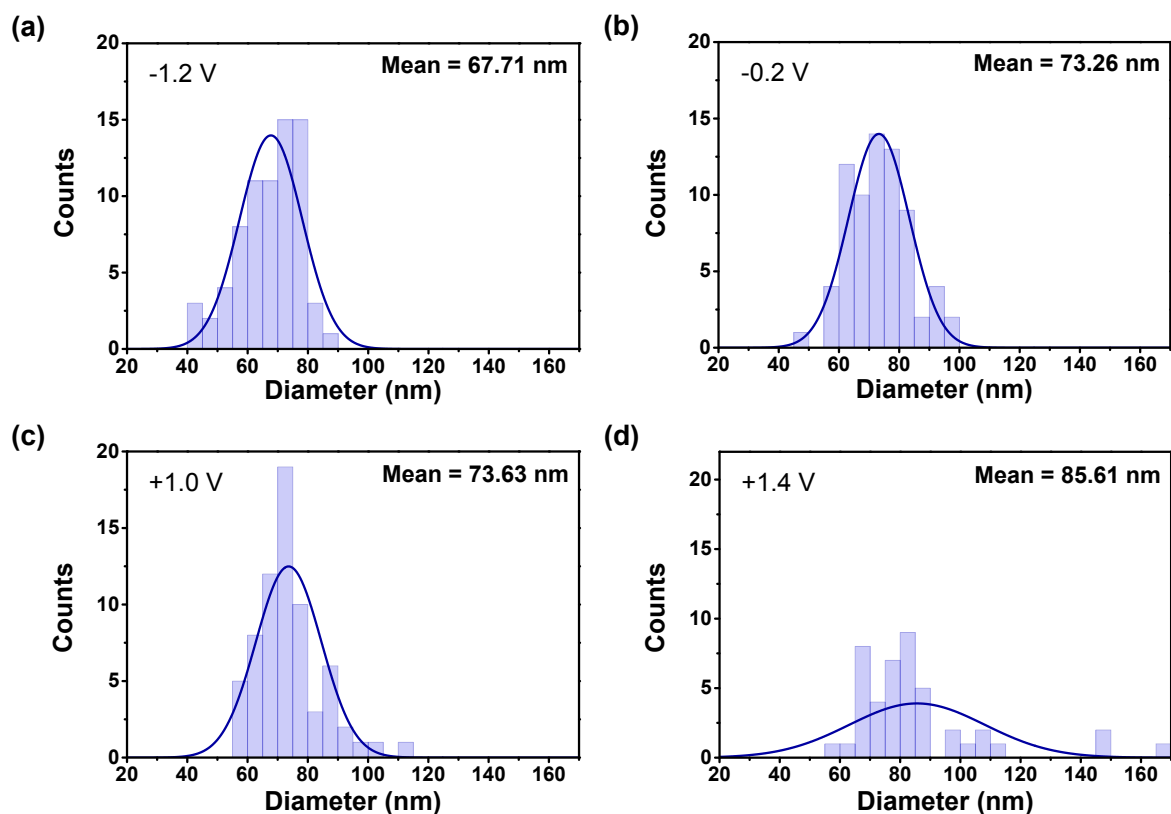

**Figure S6.** Diameter distribution of the polypyrrole nanowires in the 3D-CNF with different oxidation levels: (a) -1.2 V; (b) -0.2 V; (c) +1.0 V; (d) +1.4 V.

## 7. Surface area and pore distribution of the 3D-CNF with voltage variation.

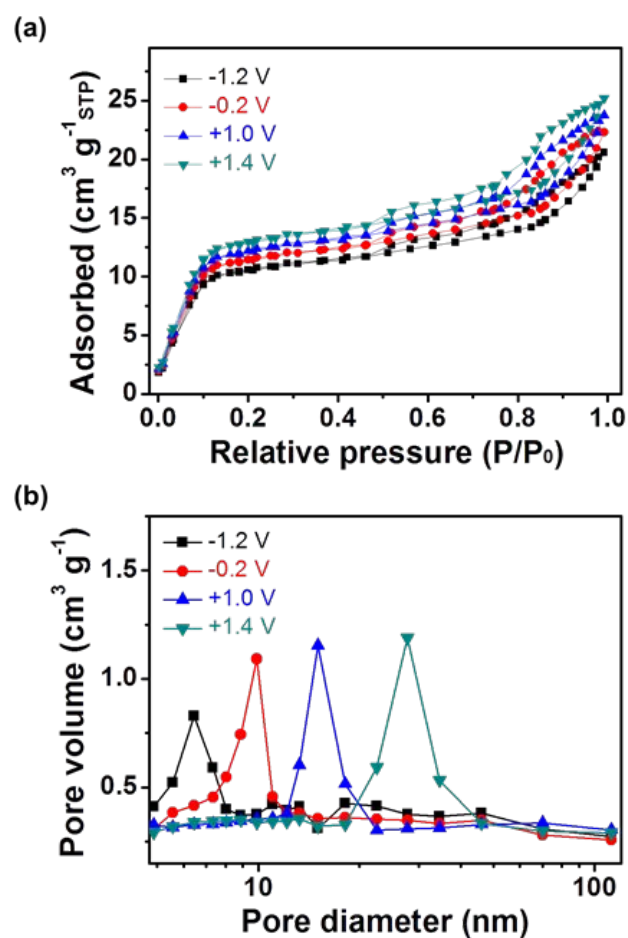

**Figure S7.** (a) Nitrogen adsorption-desorption and (b) pore size distribution curves of 3D-CNF with different oxidation levels (black: -1.2 V; red: -0.2 V; blue: +1.0 V; green: +1.4 V).



## 8. Structure of sensor electrode

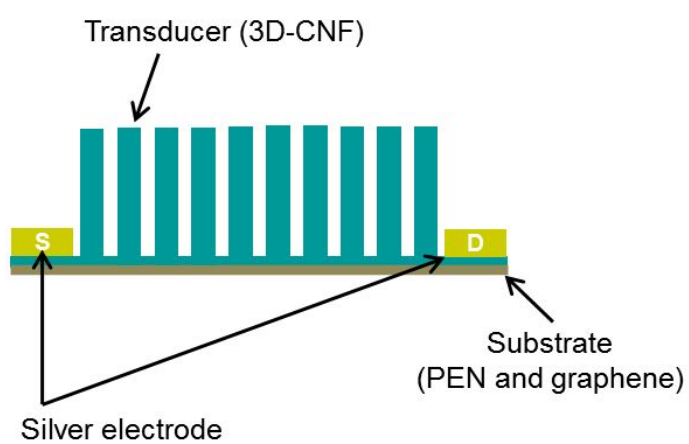

**Figure S8.** Structure of 3D-CNF based chemical sensor electrode.

## 9. Sensing performance of CVD graphene

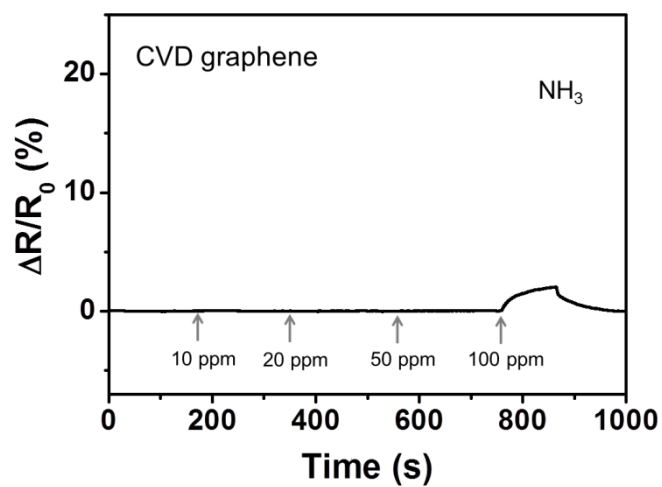

**Figure S9.** Normalized resistance changes of the CVD graphene upon sequential exposure to NH<sub>3</sub> gas.

## 10. Real bending images of the sensor electrode

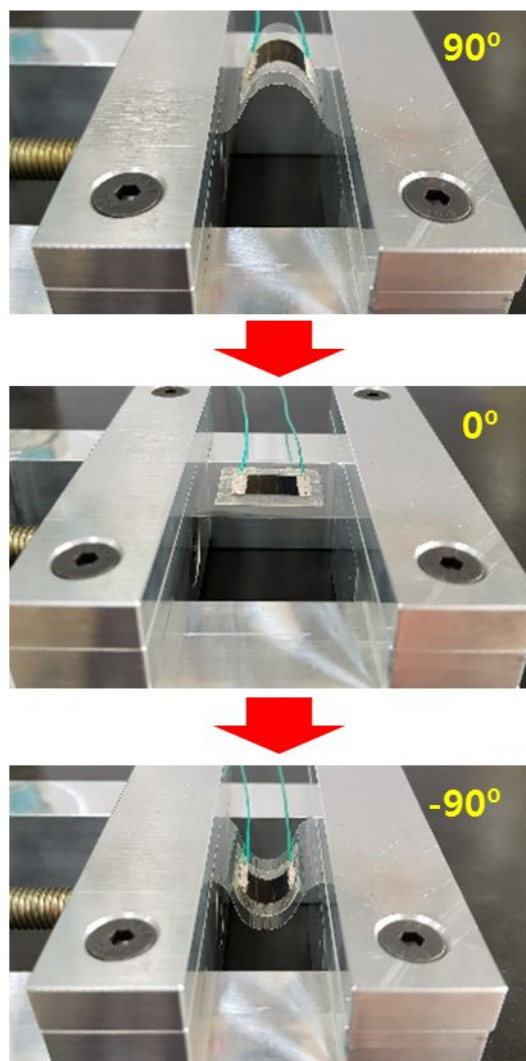

**Figure S10.** Photograph real images of the sensor electrode under different deformations for 1 cycle.
